# Supplementary material for: Myoinositols Prevent Gestational Diabetes Mellitus and Related Complications: A Systematic Review and Meta-Analysis of Randomized Controlled Trials
Source: MDPI journal article supplement (doi:10.3390/nu15194224), 2023-09-30
Supplement: s1 [file s1]

# Myoinositols Prevent Gestational Diabetes Mellitus and Related Complications: A Systematic Review and Meta-Analysis of Randomized Controlled Trials

**Dorina Greff** <sup>1,2,3</sup>, **Szilárd Váncsa** <sup>1,4,5</sup>, **Alex Váradi** <sup>4,6,7</sup>, **Julia Szinte** <sup>1,2,3</sup>, **Sunjune Park** <sup>1,3</sup> and **Péter Hegyi** <sup>1,4,5</sup>, **Péter Nyirády** <sup>1,8</sup>, **Nándor Ács** <sup>1,2</sup>, **Eszter Mária Horváth** <sup>3,\*</sup> and **Szabolcs Várbíró** <sup>2,9,10</sup>

1 Centre for Translational Medicine, Semmelweis University, 1085 Budapest, Hungary; [acs.nandor@med.semmelweis-univ.hu](mailto:acs.nandor@med.semmelweis-univ.hu) (N.Á.)

2 Department of Obstetrics and Gynecology, Semmelweis University, 1083 Budapest, Hungary

3 Department of Physiology, Semmelweis University, Tűzoltó Str. 37-47, 1094 Budapest, Hungary

4 Institute for Translational Medicine, Medical School, University of Pécs, 7621 Pécs, Hungary

5 Institute of Pancreatic Diseases, Semmelweis University, 1085 Budapest, Hungary

6 Department of Metagenomics, University of Debrecen, 4032 Debrecen, Hungary

7 Department of Laboratory Medicine, Medical School, University of Pécs, 7621 Pécs, Hungary

8 Department of Urology, Semmelweis University, 1083 Budapest, Hungary

9 Workgroup for Science Management, Doctoral School, Semmelweis University, 1085 Budapest, Hungary

10 Department of Obstetrics and Gynecology, University of Szeged, 6725 Szeged, Hungary

\* Correspondence: [horvath.eszter@med.semmelweis-univ.hu](mailto:horvath.eszter@med.semmelweis-univ.hu); Tel.: +36-(1)-459-1500

## **TABLE OF CONTENT**

**Figure S1.** Forest plots representing the risk of developing GDM

**Figure S2.** Forest plots representing the mean difference of fasting glucose

**Figure S3.** Forest plots representing the mean difference of 1h-OGTT

**Figure S4.** Forest plots representing the mean difference of 2h-OGTT

**Figure S5.** Forest plots representing the risk of insulin need

**Figure S6.** Forest plots representing the risk of pregnancy-induced hypertensive disorders

**Figure S7.** Forest plots representing the risk of preterm birth

**Figure S8.** Forest plots representing the mean difference of gestational age at birth

**Figure S9.** Forest plots representing the risk of C-section rate

**Figure S10.** Forest plots representing the risk of shoulder dystocia

**Figure S11.** Forest plots representing the mean difference of birthweight

**Figure S12.** Forest plots representing the risk of macrosomia

**Figure S13.** Forest plots representing the risk of neonatal hypoglycemia

**Figure S14.** Forest plots representing the risk of NICU admission

**Table S1.** PRISMA checklist

**Table S2.** Inclusion and exclusion criteria

**Table S3.** Risk of bias assessment using the Risk of Bias 2 tool

**Table S4.** GRADE: The quality of evidence in the inositol treated groups compared to placebo.

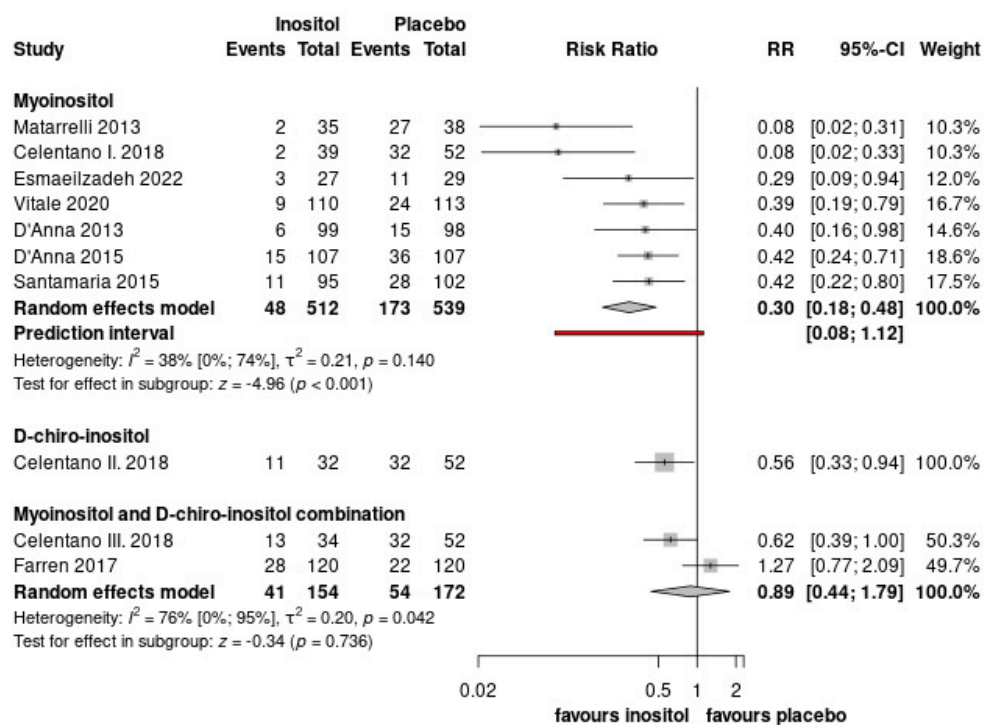

**Figure S1.** Forest plots representing the risk of developing GDM

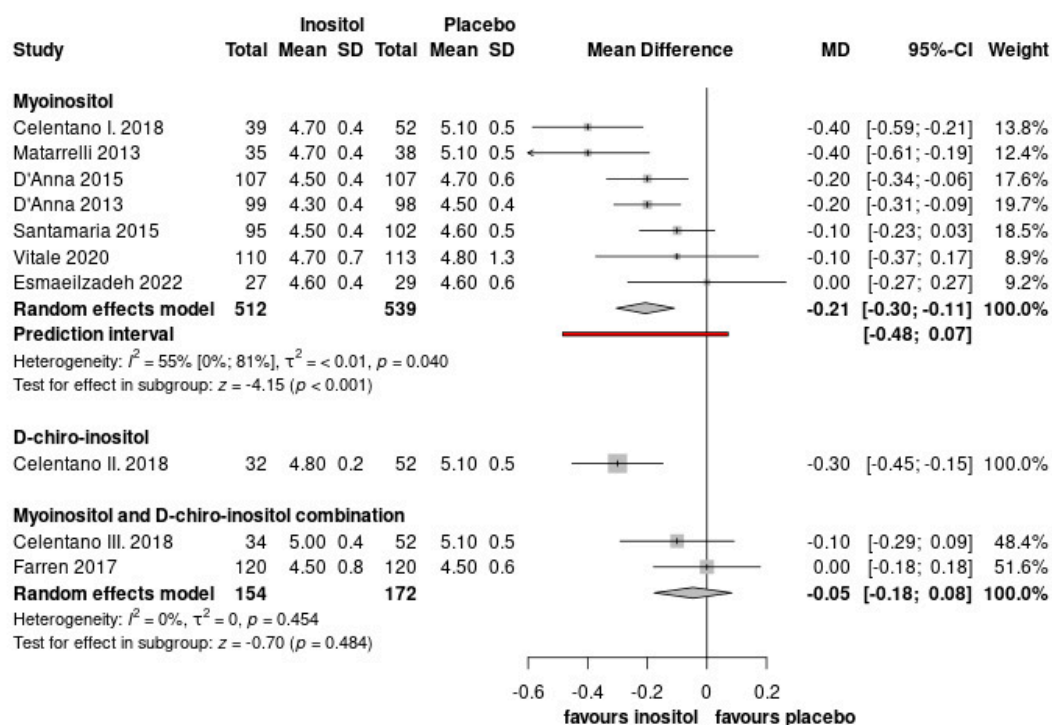

**Figure S2.** Forest plots representing the mean differences of fasting glucose

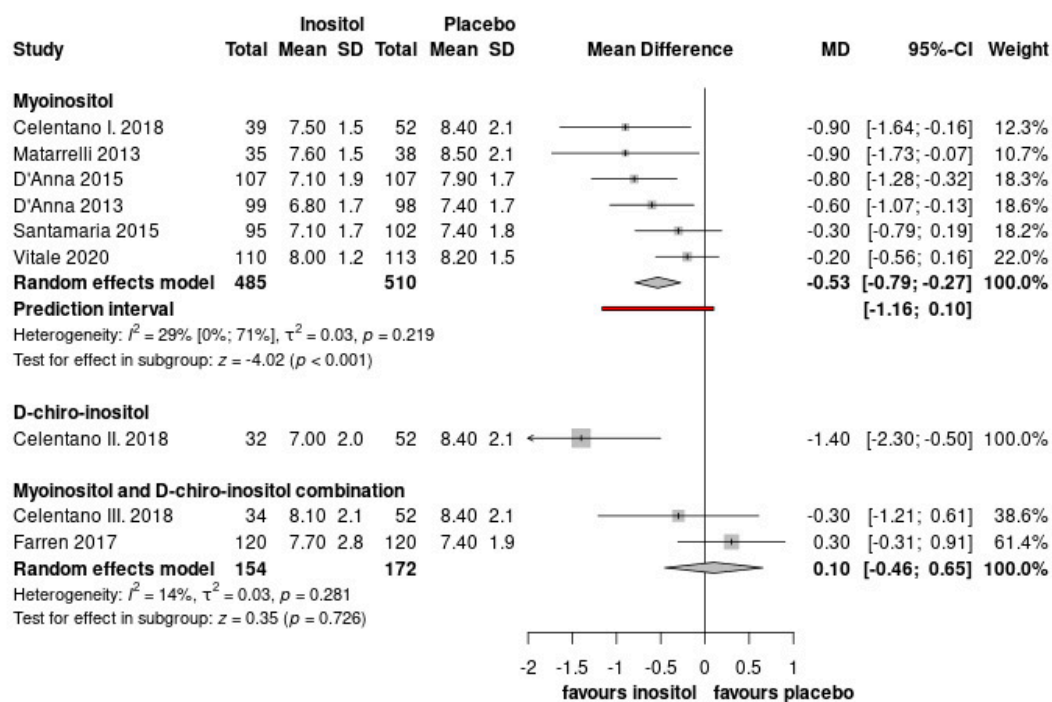

**Figure S3.** Forest plots representing the mean differences of 1h-OGTT

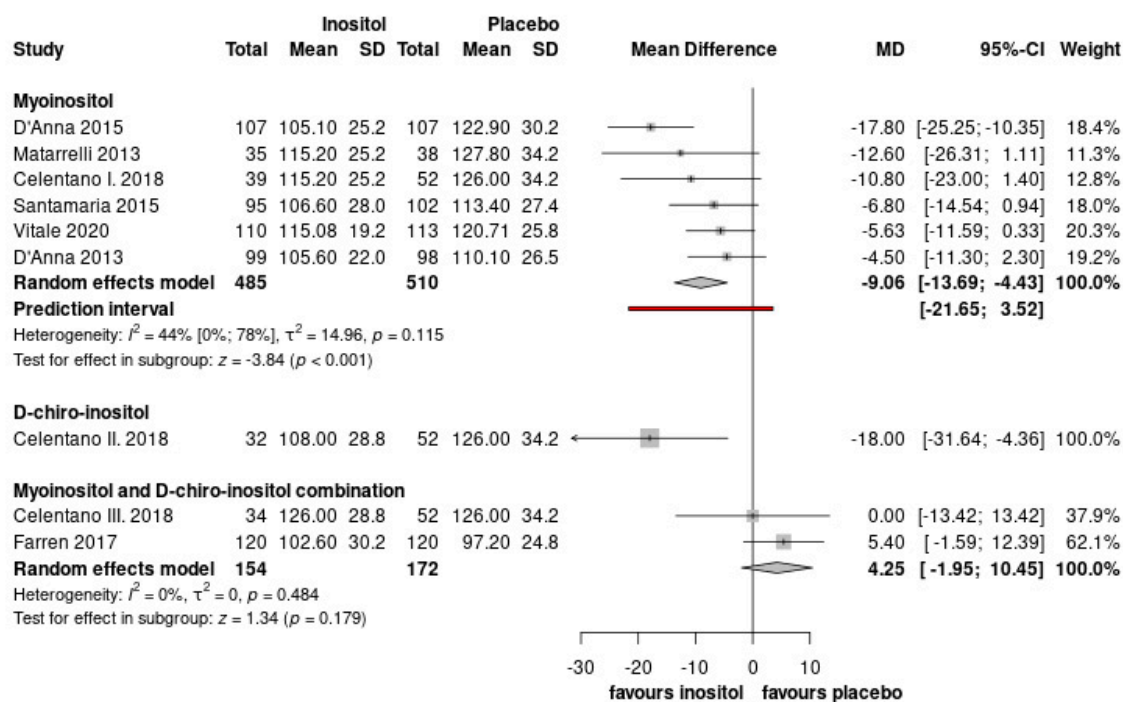

**Figure S4** Forest plots representing the mean differences of 2h-OGTT

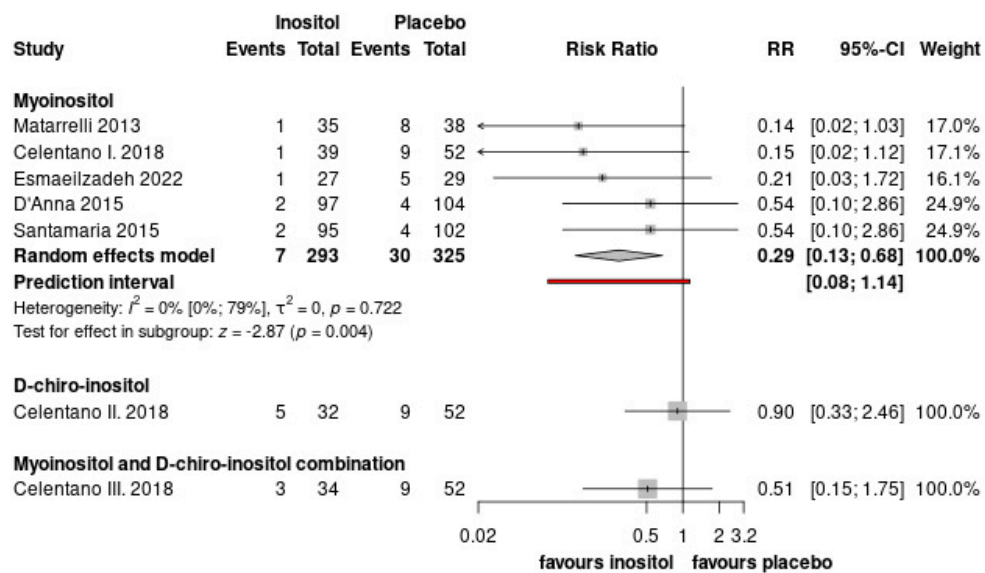

**Figure S5.** Forest plots representing the risk of insulin need

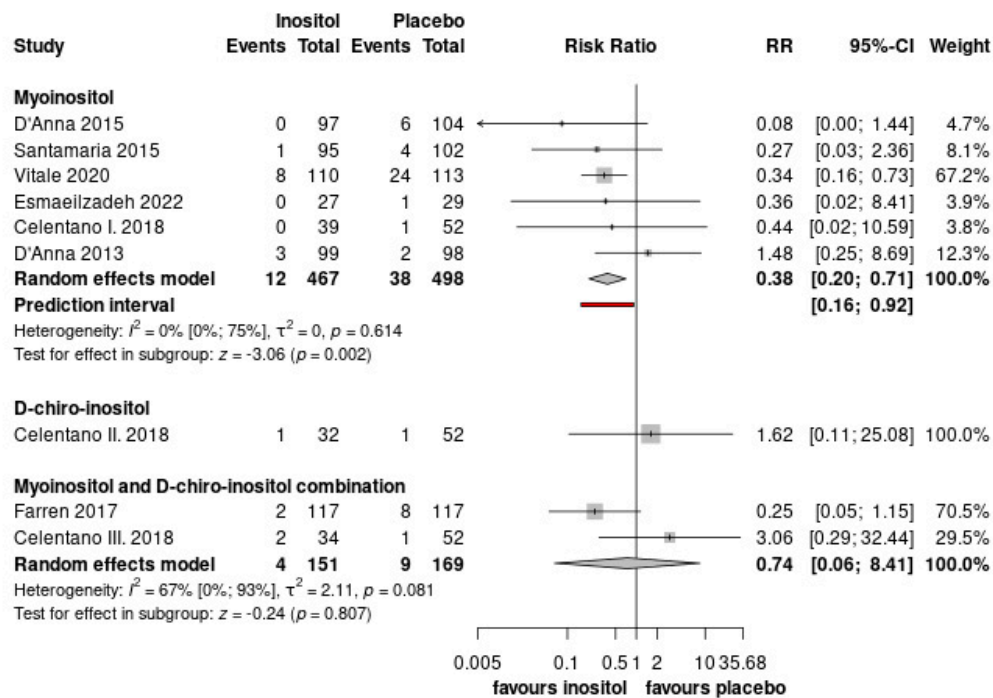

**Figure S6.** Forest plots representing the risk of pregnancy-induced hypertensive disorders



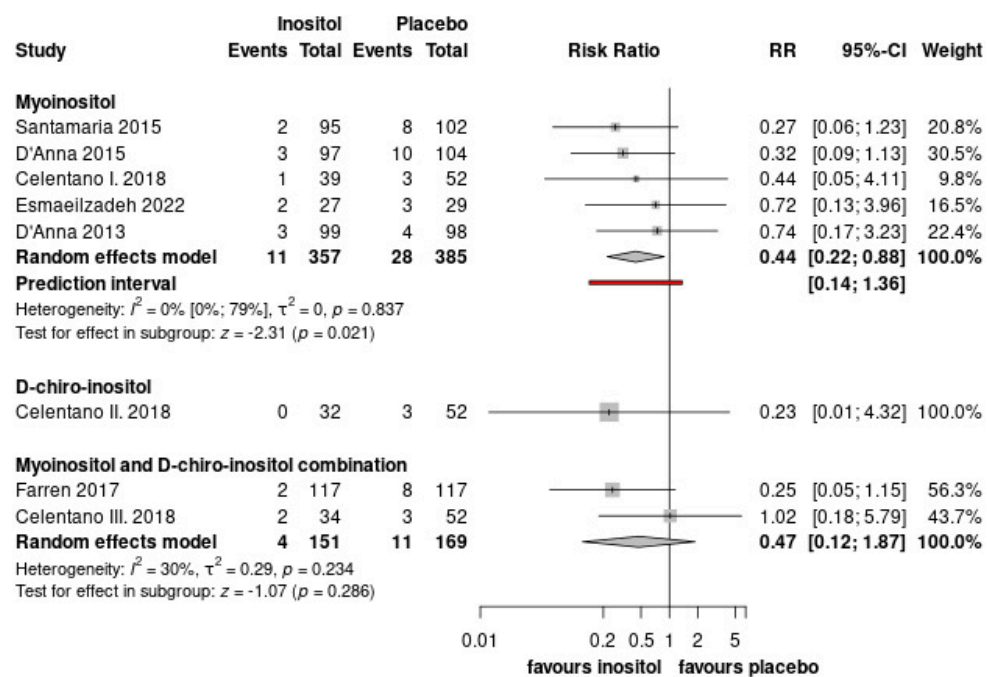

**Figure S7.** Forest plots representing the risk of preterm birth

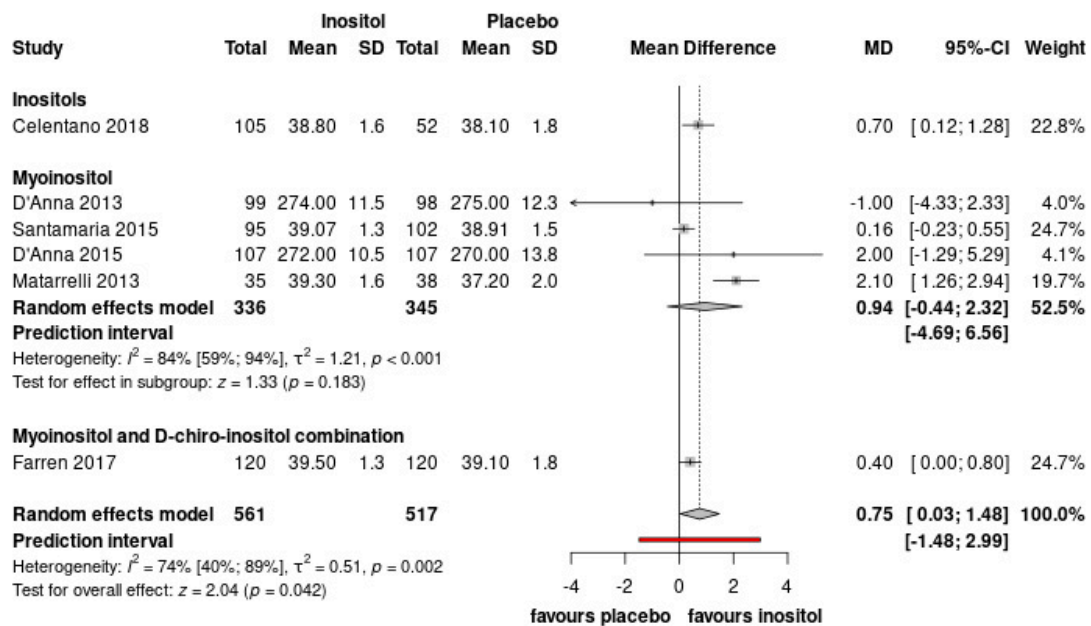

**Figure S8a.** Forest plots representing the mean difference of gestational age at birth

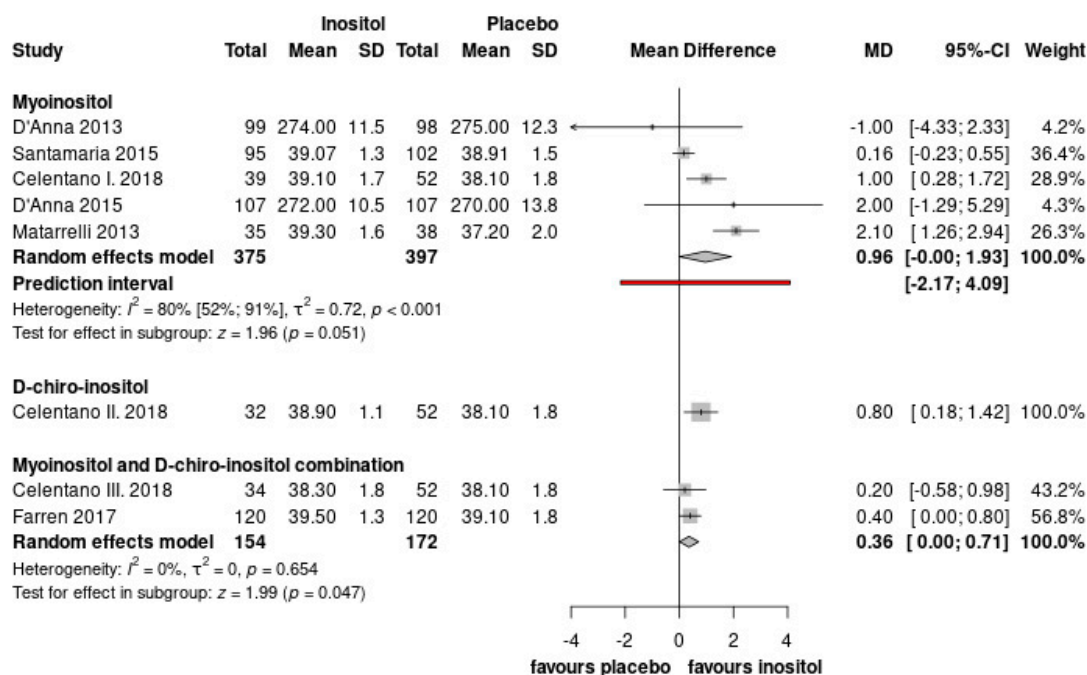

**Figure S8b.** Forest plots representing the mean difference of gestational age at birth

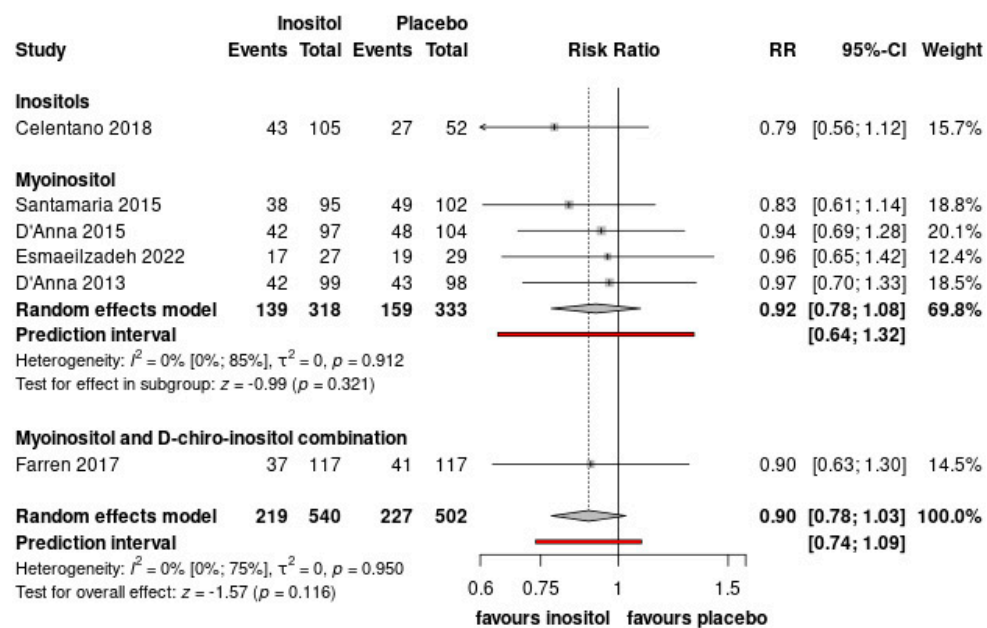

**Figure S9a.** Forest plots representing the risk of C-section rate

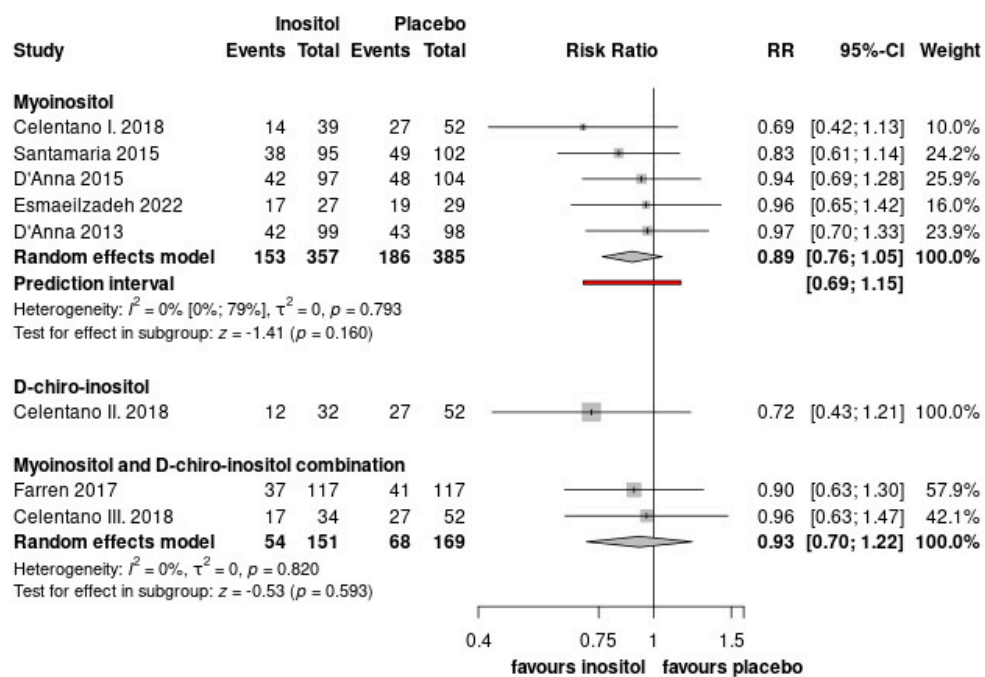

**Figure S9b.** Forest plots representing the risk of C-section rate

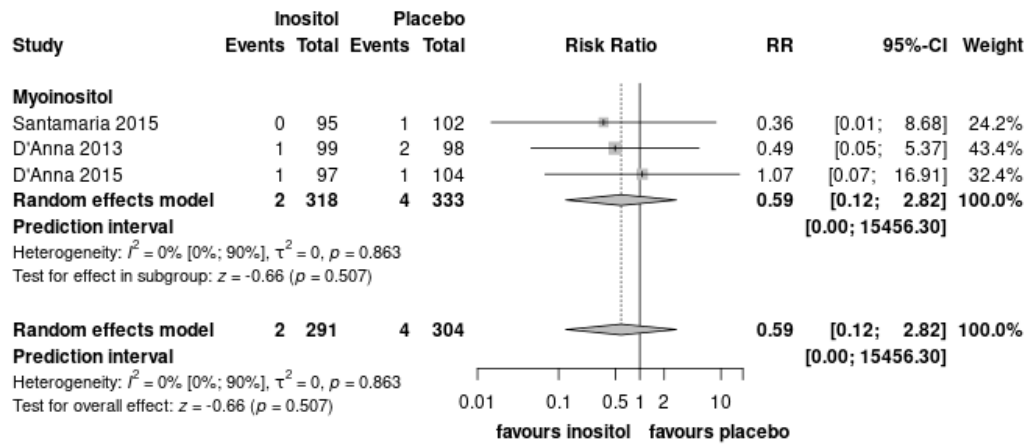

**Figure S10.** Forest plots representing the risk of shoulder dystocia

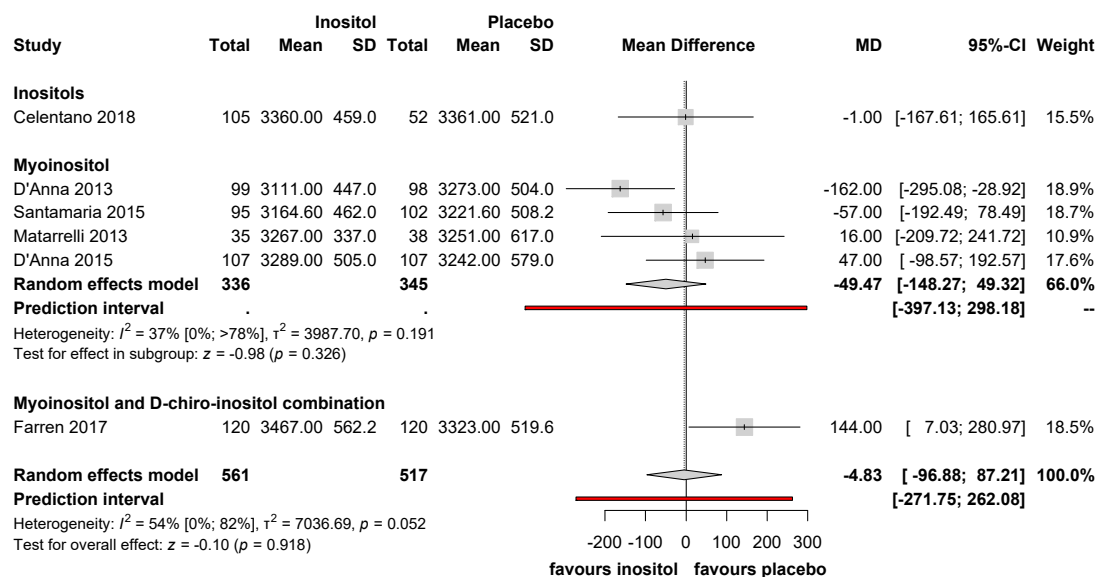

**Figure S11a.** Forest plots representing the mean difference of birthweight

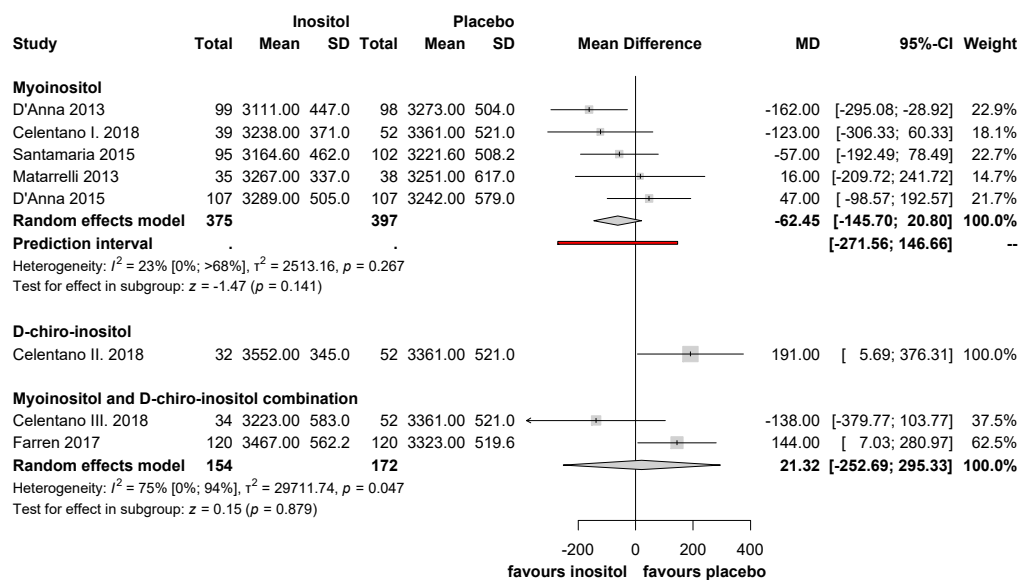

**Figure S11b.** Forest plots representing the mean difference of birthweight

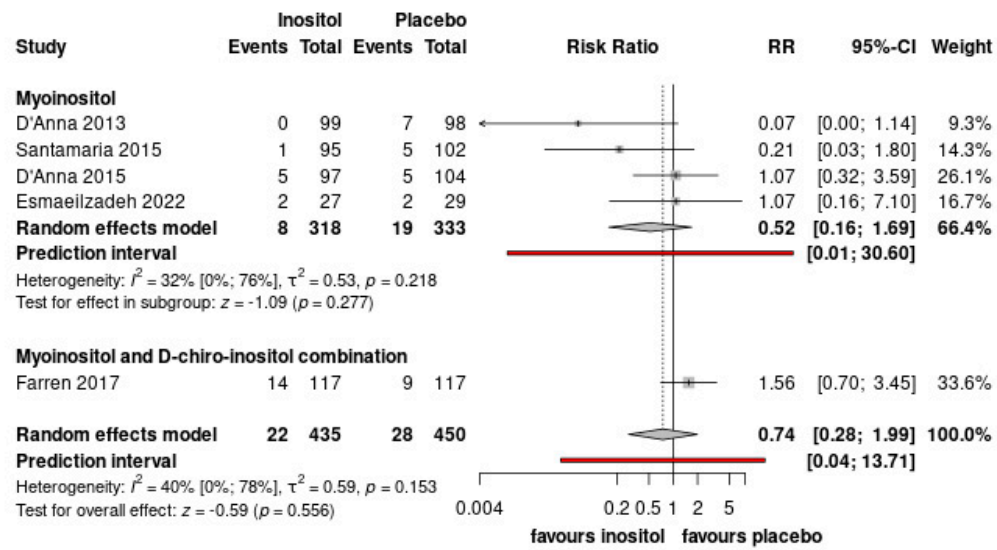

**Figure S12.** Forest plots representing the risk of macrosomia



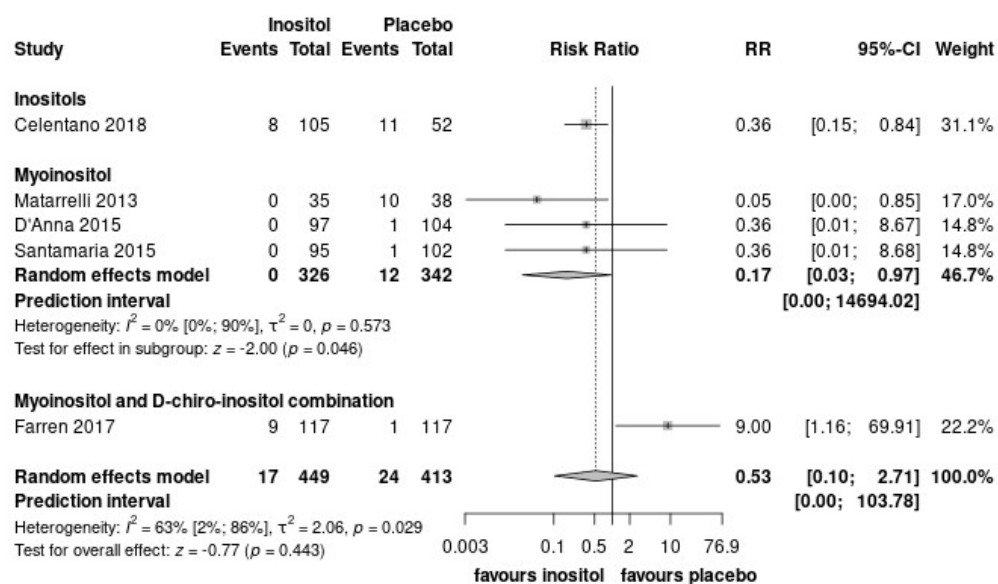

**Figure S13.** Forest plots representing the risk of neonatal hypoglycemia

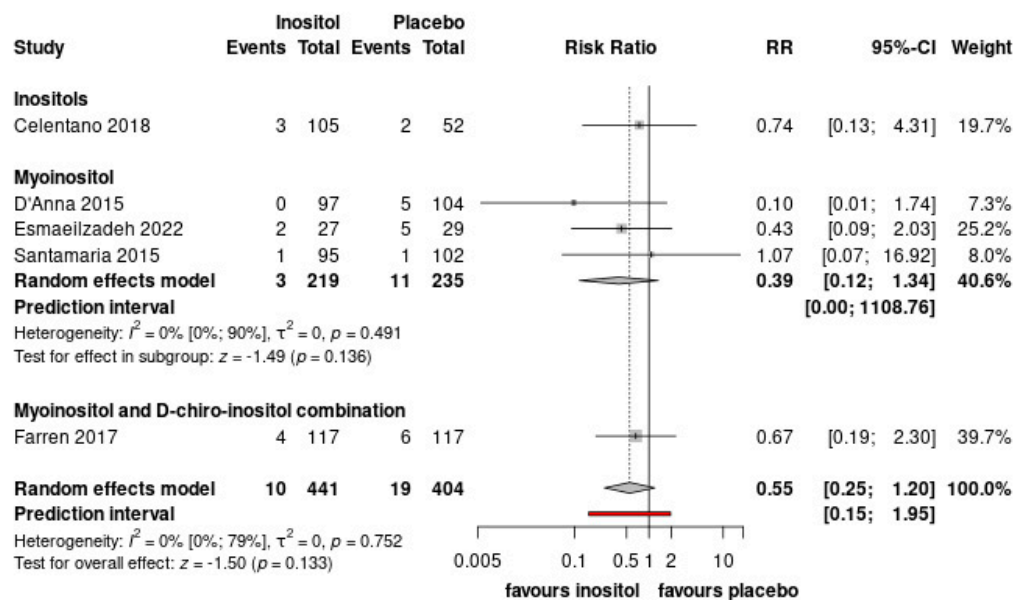

**Figure S14a.** Forest plots representing the risk of NICU admission

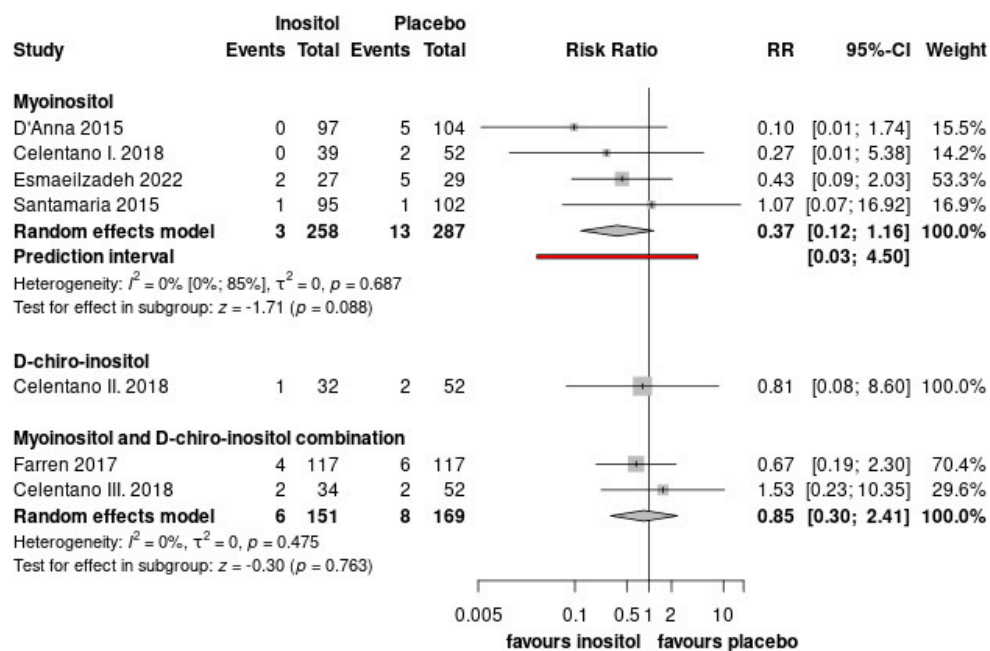

**Figure S14b.** Forest plots representing the risk of NICU admission

**Table S1.** PRISMA checklist

| Section and topic       | Item # | Checklist item                                                                                                                                                                                                                                                                                       | Location where item is reported |
|-------------------------|--------|------------------------------------------------------------------------------------------------------------------------------------------------------------------------------------------------------------------------------------------------------------------------------------------------------|---------------------------------|
| <b>Title</b>            |        |                                                                                                                                                                                                                                                                                                      |                                 |
| Title                   | 1      | Identify the report as a systematic review.                                                                                                                                                                                                                                                          | 2-3                             |
| <b>Abstract</b>         |        |                                                                                                                                                                                                                                                                                                      |                                 |
| Abstract                | 2      | See the PRISMA 2020 for Abstracts checklist (table 2).                                                                                                                                                                                                                                               |                                 |
| <b>Introduction</b>     |        |                                                                                                                                                                                                                                                                                                      |                                 |
| Rationale               | 3      | Describe the rationale for the review in the context of existing knowledge.                                                                                                                                                                                                                          | 81-106                          |
| Objectives              | 4      | Provide an explicit statement of the objective(s) or question(s) the review addresses.                                                                                                                                                                                                               | 107-110                         |
| <b>Methods</b>          |        |                                                                                                                                                                                                                                                                                                      |                                 |
| Eligibility criteria    | 5      | Specify the inclusion and exclusion criteria for the review and how studies were grouped for the syntheses.                                                                                                                                                                                          | 107-112                         |
| Information sources     | 6      | Specify all databases, registers, websites, organisations, reference lists and other sources searched or consulted to identify studies. Specify the date when each source was last searched or consulted.                                                                                            | 134-140                         |
| Search strategy         | 7      | Present the full search strategies for all databases, registers and websites, including any filters and limits used.                                                                                                                                                                                 | 134-140                         |
| Selection process       | 8      | Specify the methods used to decide whether a study met the inclusion criteria of the review, including how many reviewers screened each record and each report retrieved, whether they worked independently, and if applicable, details of automation tools used in the process.                     | 142-145                         |
| Data collection process | 9      | Specify the methods used to collect data from reports, including how many reviewers collected data from each report, whether they worked independently, any processes for obtaining or confirming data from study investigators, and if applicable, details of automation tools used in the process. | 145-156                         |
| Data items              | 10a    | List and define all outcomes for which data were sought. Specify whether all results that were compatible with each outcome domain in each study were sought (e.g. for all measures, time points, analyses), and if not, the methods used to decide which results to collect.                        | 123-132                         |
|                         | 10b    | List and define all other variables for which data were sought (e.g. participant and intervention characteristics, funding sources). Describe any assumptions made about any missing or unclear information.                                                                                         | 147-156                         |

|                               |     |                                                                                                                                                                                                                                                                   |         |
|-------------------------------|-----|-------------------------------------------------------------------------------------------------------------------------------------------------------------------------------------------------------------------------------------------------------------------|---------|
| Study risk of bias assessment | 11  | Specify the methods used to assess risk of bias in the included studies, including details of the tool(s) used, how many reviewers assessed each study and whether they worked independently, and if applicable, details of automation tools used in the process. | 158-161 |
| Effect measures               | 12  | Specify for each outcome the effect measure(s) (e.g. risk ratio, mean difference) used in the synthesis or presentation of results.                                                                                                                               | 168-172 |
| Synthesis methods             | 13a | Describe the processes used to decide which studies were eligible for each synthesis (e.g. tabulating the study intervention characteristics and comparing against the planned groups for each synthesis (item #5)).                                              | 166-180 |
|                               | 13b | Describe any methods required to prepare the data for presentation or synthesis, such as handling of missing summary statistics, or data conversions.                                                                                                             | 166-180 |
|                               | 13c | Describe any methods used to tabulate or visually display results of individual studies and syntheses.                                                                                                                                                            | 166-180 |
|                               | 13d | Describe any methods used to synthesise results and provide a rationale for the choice(s). If meta-analysis was performed, describe the model(s), method(s) to identify the presence and extent of statistical heterogeneity, and software package(s) used.       | 166-180 |
|                               | 13e | Describe any methods used to explore possible causes of heterogeneity among study results (e.g. subgroup analysis, meta-regression).                                                                                                                              | 166-180 |
|                               | 13f | Describe any sensitivity analyses conducted to assess robustness of the synthesised results.                                                                                                                                                                      | -       |
| Reporting bias assessment     | 14  | Describe any methods used to assess risk of bias due to missing results in a synthesis (arising from reporting biases).                                                                                                                                           | 157-161 |
| Certainty assessment          | 15  | Describe any methods used to assess certainty (or confidence) in the body of evidence for an outcome.                                                                                                                                                             | 162-164 |
| <b>Results</b>                |     |                                                                                                                                                                                                                                                                   |         |
| Study selection               | 16a | Describe the results of the search and selection process, from the number of records identified in the search to the number of studies included in the review, ideally using a flow diagram (see fig 1).                                                          | 184-186 |
|                               | 16b | Cite studies that might appear to meet the inclusion criteria, but which were excluded, and explain why they were excluded.                                                                                                                                       | 182-184 |
| Study characteristics         | 17  | Cite each included study and present its characteristics.                                                                                                                                                                                                         | 198-201 |
| Risk of bias in studies       | 18  | Present assessments of risk of bias for each included study.                                                                                                                                                                                                      | 242-247 |
| Results of individual studies | 19  | For all outcomes, present, for each study: (a) summary statistics for each group (where appropriate) and (b) an effect estimate and its precision (e.g. confidence/credible interval), ideally using structured tables or plots.                                  | 204-241 |
|                               | 20a | For each synthesis, briefly summarise the characteristics and risk of bias among contributing studies.                                                                                                                                                            |         |

|                                                 |     |                                                                                                                                                                                                                                                                                      |         |
|-------------------------------------------------|-----|--------------------------------------------------------------------------------------------------------------------------------------------------------------------------------------------------------------------------------------------------------------------------------------|---------|
| Results of syntheses                            | 20b | Present results of all statistical syntheses conducted. If meta-analysis was done, present for each the summary estimate and its precision (e.g. confidence/credible interval) and measures of statistical heterogeneity. If comparing groups, describe the direction of the effect. | 203-241 |
|                                                 | 20c | Present results of all investigations of possible causes of heterogeneity among study results.                                                                                                                                                                                       | 203-241 |
|                                                 | 20d | Present results of all sensitivity analyses conducted to assess the robustness of the synthesised results.                                                                                                                                                                           | 203-241 |
| Reporting biases                                | 21  | Present assessments of risk of bias due to missing results (arising from reporting biases) for each synthesis assessed.                                                                                                                                                              | 242-247 |
| Certainty of evidence                           | 22  | Present assessments of certainty (or confidence) in the body of evidence for each outcome assessed.                                                                                                                                                                                  | 248-249 |
| <b>Discussion</b>                               |     |                                                                                                                                                                                                                                                                                      |         |
| Discussion                                      | 23a | Provide a general interpretation of the results in the context of other evidence.                                                                                                                                                                                                    | 251-321 |
|                                                 | 23b | Discuss any limitations of the evidence included in the review.                                                                                                                                                                                                                      | 323-330 |
|                                                 | 23c | Discuss any limitations of the review processes used.                                                                                                                                                                                                                                | 323-330 |
|                                                 | 23d | Discuss implications of the results for practice, policy, and future research.                                                                                                                                                                                                       | 332-340 |
| <b>Other information</b>                        |     |                                                                                                                                                                                                                                                                                      |         |
| Registration and protocol                       | 24a | Provide registration information for the review, including register name and registration number, or state that the review was not registered.                                                                                                                                       | 114     |
|                                                 | 24b | Indicate where the review protocol can be accessed, or state that a protocol was not prepared.                                                                                                                                                                                       | 114     |
|                                                 | 24c | Describe and explain any amendments to information provided at registration or in the protocol.                                                                                                                                                                                      | -       |
| Support                                         | 25  | Describe sources of financial or non-financial support for the review, and the role of the funders or sponsors in the review.                                                                                                                                                        | 26-30   |
| Competing interests                             | 26  | Declare any competing interests of review authors.                                                                                                                                                                                                                                   | 25      |
| Availability of data, code, and other materials | 27  | Report which of the following are publicly available and where they can be found: template data collection forms; data extracted from included studies; data used for all analyses; analytic code; any other materials used in the review.                                           | 347-349 |

**Table S2. Inclusion and exclusion criteria**

| <b>Author</b>          | <b>Inclusion criteria</b>                                                                                                                                                                                                                                                                                                                                                                          | <b>Exclusion criteria</b>                                                                                                                                                                                                                                                                                                                                                                                          |
|------------------------|----------------------------------------------------------------------------------------------------------------------------------------------------------------------------------------------------------------------------------------------------------------------------------------------------------------------------------------------------------------------------------------------------|--------------------------------------------------------------------------------------------------------------------------------------------------------------------------------------------------------------------------------------------------------------------------------------------------------------------------------------------------------------------------------------------------------------------|
| Celentano, 2018 (1)    | „Consecutive singleton pregnant women attending our High-Risk Pregnancy Unit of the Hospital of University of “G. d’Annunzio” in Chieti from January 2012 to July 2017 upon referral for an elevated fasting glucose (glycemia >5.1 mmol/L or 92 mg/dL and <7.0 mmol/L or 126 mg/dL) at first trimester blood exams according to National Guidelines [17] were enrolled during their first visit.” | „Pregestational obesity (BMI above 35), patients younger than 18 years-old, multiple gestations, and pregestational diabetes were exclusion criteria.”                                                                                                                                                                                                                                                             |
| D’Anna, 2013 (2)       | „1) first-degree relatives (mother father, or both) affected by type 2 diabetes, 2) prepregnancy BMI ,30 kg/m2, 3) fasting plasma glucose ,126 mg/dL and random glycemia ,200 mg/dL, 4) single pregnancy, and 5) Caucasian race.”                                                                                                                                                                  | „Exclusion criteria were as followings: 1) prepregnancy BMI >30 kg/m2, 2) previous GDM, 3) pregestational diabetes, 4) firsttrimester glycosuria, 5) first-degree relative(s) (mother or father) not affected by type 2 diabetes, 6) fasting plasma glucose >126 mg/dL or random glycemia >200 mg/dL, 7) twin pregnancies, 8) associated therapy with corticosteroids, 9) not Caucasian race, and 10) PCOS women.” |
| D’Anna, 2015 (3)       | „Inclusion criteria were 1) prepregnancy body mass index (BMI) (calculated as weight (kg)/m2) 30 or greater and 2) singleton gestation.”                                                                                                                                                                                                                                                           | Exclusion criteria were 1) previous GDM, 2) pregestational diabetes, 3) first-trimester glycosuria (urine glucose value 10 mg/dL or greater), 4) first-trimester fasting plasma glucose 126 mg/dL or greater or random plasma glucose 200 mg/dL or greater, 5) concomitant treatment with corticosteroids; and 6) hypertension or renal or hepatic disease.                                                        |
| Esmaeilzadeh, 2022 (4) | “Overweight, pregnant women (pregnancy BMI $\geq$ 25 and < 30 kg/ m2), aged 18–40 “                                                                                                                                                                                                                                                                                                                | “The women with diabetes, a history of hypertension, cardiovascular diseases, current smoking or drinking habits were excluded from the study. Those who had experienced the death of family members or received corticosteroids during pregnancy                                                                                                                                                                  |

|                      |                                                                                                                                                                                                                                                                                                                                                         |                                                                                                                                                                                                                  |
|----------------------|---------------------------------------------------------------------------------------------------------------------------------------------------------------------------------------------------------------------------------------------------------------------------------------------------------------------------------------------------------|------------------------------------------------------------------------------------------------------------------------------------------------------------------------------------------------------------------|
|                      |                                                                                                                                                                                                                                                                                                                                                         | were also excluded from the study.”                                                                                                                                                                              |
| Farren, 2017 (5)     | „Women with a family history in a first-degree relative of diabetes, either type 1 or type 2, were eligible for inclusion.”                                                                                                                                                                                                                             | „Exclusion criteria were: 1) age younger than 18 years, 2) multiple pregnancy, 3) limited understanding of English, and 4) any pre-existing liver or kidney disease or diabetes.”                                |
| Matarelli, 2013 (6)  | „Consecutive singleton pregnant women attending our High Risk Pregnancy Unit of the Hospital of University “Gabriele d’Annunzio” in Chieti from August 2010 to April 2011 upon referral for an elevated fasting glucose (glycemia >5.1 mmol/L or 92 mg/dL and <7.0 mmol/L or 126 mg/dL) according to National Guidelines were eligible for enrollment.” | „Pre-gestational obesity (BMI above 35) and refusal to participate were the only exclusion criteria.”                                                                                                            |
| Santamaria, 2016 (7) | „The inclusion criteria were: (1) pre-pregnancy BMI >25 and 530 kg/m <sup>2</sup> , (2) first trimester fasting plasma glucose <126 mg/dl and/or random glycemia<200 mg/dl, (3) single pregnancy and (4) Caucasian ethnicity.”                                                                                                                          | „Exclusion criteria were as follow: (1) pre-pregnancy BMI<25 and >30 kg/m <sup>2</sup> , (2) previous GDM, (3) pre-gestational diabetes, (4) first trimester glycosuria and (5) treatment with corticosteroids.” |
| Vitale, 2020 (8)     | „... pre-pregnancy BMI > 25 and <30 kg/m <sup>2</sup> , first-trimester fasting plasma glucose <126 mg/dl and/or random glycaemia <200 mg/ dl, single pregnancy, and Caucasian ethnicity.”                                                                                                                                                              | „We excluded women who had a pre-pregnancy BMI <25 and > 30 kg/m <sup>2</sup> , previous GDM, pre-gestational diabetes, first-trimester glycosuria, and in treatment with corticosteroids.”                      |



**Table S3.** Risk of bias assessment using the Risk of Bias 2 tool

| <b>Study ID</b> | <b>Outcome</b>                           | <b>Randomization process</b> | <b>Deviations from intended interventions</b> | <b>Missing outcome data</b> | <b>Measurement of the outcome</b> | <b>Selection of the reported result</b> | <b>Overall</b> |
|-----------------|------------------------------------------|------------------------------|-----------------------------------------------|-----------------------------|-----------------------------------|-----------------------------------------|----------------|
| Celentano       | GDM                                      | Low                          | Some concerns                                 | Low                         | Low                               | Some concerns                           | Some concerns  |
| Celentano       | Insulin therapy                          | Low                          | Some concerns                                 | Low                         | Low                               | Some concerns                           | Some concerns  |
| Celentano       | C-section rate                           | Low                          | Some concerns                                 | Low                         | Low                               | Some concerns                           | Some concerns  |
| Celentano       | pregnancy-induced hypertensive disorders | Low                          | Some concerns                                 | Low                         | Low                               | Some concerns                           | Some concerns  |
| Celentano       | Preterm birth                            | Low                          | Some concerns                                 | Low                         | Low                               | Some concerns                           | Some concerns  |
| Celentano       | Neonatal hypoglycemia                    | Low                          | Some concerns                                 | Low                         | Low                               | Some concerns                           | Some concerns  |
| Celentano       | Neonatal intensive care unit admission   | Low                          | Some concerns                                 | Low                         | Low                               | Some concerns                           | Some concerns  |
| Celentano       | OGTT 0'                                  | Low                          | Some concerns                                 | Low                         | Low                               | Some concerns                           | Some concerns  |
| Celentano       | OGTT 60'                                 | Low                          | Some concerns                                 | Low                         | Low                               | Some concerns                           | Some concerns  |
| Celentano       | OGTT 120'                                | Low                          | Some concerns                                 | Low                         | Low                               | Some concerns                           | Some concerns  |
| Celentano       | Gestational age at birth                 | Low                          | Some concerns                                 | Low                         | Low                               | Some concerns                           | Some concerns  |
| Celentano       | Birthweight                              | Low                          | Some concerns                                 | Low                         | Low                               | Some concerns                           | Some concerns  |
| Celentano       | LGA                                      | Low                          | Some concerns                                 | Low                         | Low                               | Some concerns                           | Some concerns  |
| D'Anna 2015     | OGTT 0'                                  | Some concerns                | Some concerns                                 | Some concerns               | Low                               | Low                                     | Some concerns  |
| D'Anna 2015     | OGTT 60'                                 | Some concerns                | Some concerns                                 | Some concerns               | Low                               | Low                                     | Some concerns  |
| D'Anna 2015     | OGTT 120'                                | Some concerns                | Some concerns                                 | Some concerns               | Low                               | Low                                     | Some concerns  |
| D'Anna 2015     | GDM                                      | Some concerns                | Some concerns                                 | Some concerns               | Low                               | Low                                     | Some concerns  |
| D'Anna 2015     | Fasting insulin                          | Some concerns                | Some concerns                                 | Some concerns               | Low                               | Low                                     | Some concerns  |
| D'Anna 2015     | Gestational age at birth                 | Some concerns                | Some concerns                                 | Some concerns               | Low                               | Low                                     | Some concerns  |
| D'Anna 2015     | Birth weight                             | Some concerns                | Some concerns                                 | Some concerns               | Low                               | Low                                     | Some concerns  |

|             |                                          |               |               |               |     |     |               |
|-------------|------------------------------------------|---------------|---------------|---------------|-----|-----|---------------|
| D'Anna 2015 | Macrosomia                               | Some concerns | Some concerns | Some concerns | Low | Low | Some concerns |
| D'Anna 2015 | C-section rate                           | Some concerns | Some concerns | Some concerns | Low | Low | Some concerns |
| D'Anna 2015 | pregnancy-induced hypertensive disorders | Some concerns | Some concerns | Some concerns | Low | Low | Some concerns |
| D'Anna 2015 | Insulin therapy                          | Some concerns | Some concerns | Some concerns | Low | Low | Some concerns |
| D'Anna 2015 | Neonatal hypoglycemia                    | Some concerns | Some concerns | Some concerns | Low | Low | Some concerns |
| D'Anna 2015 | Preterm birth                            | Some concerns | Some concerns | Some concerns | Low | Low | Some concerns |
| D'Anna 2015 | Shoulder dystocia                        | Some concerns | Some concerns | Some concerns | Low | Low | Some concerns |
| D'Anna 2015 | Neonatal intensive care unit admission   | Some concerns | Some concerns | Some concerns | Low | Low | Some concerns |
| D'Anna 2013 | OGTT 0'                                  | Low           | Some concerns | Low           | Low | Low | Some concerns |
| D'Anna 2013 | OGTT 60'                                 | Low           | Some concerns | Low           | Low | Low | Some concerns |
| D'Anna 2013 | OGTT 120'                                | Low           | Some concerns | Low           | Low | Low | Some concerns |
| D'Anna 2013 | Gestational age at birth                 | Low           | Some concerns | Low           | Low | Low | Some concerns |
| D'Anna 2013 | Birth weight                             | Low           | Some concerns | Low           | Low | Low | Some concerns |
| D'Anna 2013 | Macrosomia                               | Low           | Some concerns | Low           | Low | Low | Some concerns |
| D'Anna 2013 | C-section rate                           | Low           | Some concerns | Low           | Low | Low | Some concerns |
| D'Anna 2013 | pregnancy-induced hypertensive disorders | Low           | Some concerns | Low           | Low | Low | Some concerns |
| D'Anna 2013 | Preterm birth                            | Low           | Some concerns | Low           | Low | Low | Some concerns |
| D'Anna 2013 | Shoulder dystocia                        | Low           | Some concerns | Low           | Low | Low | Some concerns |
| D'Anna 2013 | Neonatal hypoglycemia                    | Low           | Some concerns | Low           | Low | Low | Some concerns |
| D'Anna 2013 | GDM                                      | Low           | Some concerns | Low           | Low | Low | Some concerns |

|             |                                          |     |               |     |     |               |               |
|-------------|------------------------------------------|-----|---------------|-----|-----|---------------|---------------|
| Esmailzadeh | GDM                                      | Low | Low           | Low | Low | Low           | Low           |
| Esmailzadeh | Insulin therapy                          | Low | Low           | Low | Low | Low           | Low           |
| Esmailzadeh | C-section                                | Low | Low           | Low | Low | Low           | Low           |
| Esmailzadeh | pregnancy-induced hypertensive disorders | Low | Low           | Low | Low | Low           | Low           |
| Esmailzadeh | Macrosomia                               | Low | Low           | Low | Low | Low           | Low           |
| Esmailzadeh | Preterm birth                            | Low | Low           | Low | Low | Low           | Low           |
| Esmailzadeh | Shoulder dystocia                        | Low | Low           | Low | Low | Low           | Low           |
| Esmailzadeh | Neonatal intensive care unit admission   | Low | Low           | Low | Low | Low           | Low           |
| Esmailzadeh | OGTT 0'                                  | Low | Low           | Low | Low | Low           | Low           |
| Farren      | GDM                                      | Low | Some concerns | Low | Low | Some concerns | Some concerns |
| Farren      | OGTT 0'                                  | Low | Some concerns | Low | Low | Some concerns | Some concerns |
| Farren      | OGTT 60'                                 | Low | Some concerns | Low | Low | Some concerns | Some concerns |
| Farren      | OGTT 120'                                | Low | Some concerns | Low | Low | Some concerns | Some concerns |
| Farren      | Gestational age at birth                 | Low | Some concerns | Low | Low | Some concerns | Some concerns |
| Farren      | Birth weight                             | Low | Some concerns | Low | Low | Some concerns | Some concerns |
| Farren      | Macrosomia                               | Low | Some concerns | Low | Low | Some concerns | Some concerns |
| Farren      | C-section rate                           | Low | Some concerns | Low | Low | Some concerns | Some concerns |
| Farren      | pregnancy-induced hypertensive disorders | Low | Some concerns | Low | Low | Some concerns | Some concerns |
| Farren      | Preterm birth                            | Low | Some concerns | Low | Low | Some concerns | Some concerns |
| Farren      | Shoulder dystocia                        | Low | Some concerns | Low | Low | Some concerns | Some concerns |

|            |                                          |               |               |               |     |               |               |
|------------|------------------------------------------|---------------|---------------|---------------|-----|---------------|---------------|
| Farren     | Neonatal intensive care unit admission   | Low           | Some concerns | Low           | Low | Some concerns | Some concerns |
| Farren     | Neonatal hypoglycemia                    | Low           | Some concerns | Low           | Low | Some concerns | Some concerns |
| Matarelli  | GDM                                      | Some concerns | Low           | Low           | Low | Some concerns | Some concerns |
| Matarelli  | Insulin therapy                          | Some concerns | Low           | Low           | Low | Low           | Some concerns |
| Matarelli  | Neonatal hypoglycemia                    | Some concerns | Low           | Low           | Low | Low           | Some concerns |
| Matarelli  | OGTT 0'                                  | Some concerns | Low           | Low           | Low | Low           | Some concerns |
| Matarelli  | OGTT 60'                                 | Some concerns | Low           | Low           | Low | Low           | Some concerns |
| Matarelli  | OGTT 120'                                | Some concerns | Low           | Low           | Low | Low           | Some concerns |
| Matarelli  | Gestational age at birth                 | Some concerns | Low           | Low           | Low | Low           | Some concerns |
| Matarelli  | Birth weight                             | Some concerns | Low           | Low           | Low | Low           | Some concerns |
| Santamaria | GDM                                      | Some concerns | Some concerns | Some concerns | Low | Some concerns | Some concerns |
| Santamaria | OGTT 0'                                  | Some concerns | Some concerns | Some concerns | Low | Some concerns | Some concerns |
| Santamaria | OGTT 60'                                 | Some concerns | Some concerns | Some concerns | Low | Some concerns | Some concerns |
| Santamaria | OGTT 120'                                | Some concerns | Some concerns | Some concerns | Low | Some concerns | Some concerns |
| Santamaria | Gestational age at birth                 | Some concerns | Some concerns | Some concerns | Low | Some concerns | Some concerns |
| Santamaria | Birth weight                             | Some concerns | Some concerns | Some concerns | Low | Some concerns | Some concerns |
| Santamaria | C-section rate                           | Some concerns | Some concerns | Some concerns | Low | Some concerns | Some concerns |
| Santamaria | Macrosomia                               | Some concerns | Some concerns | Some concerns | Low | Some concerns | Some concerns |
| Santamaria | Preterm birth                            | Some concerns | Some concerns | Some concerns | Low | Some concerns | Some concerns |
| Santamaria | pregnancy-induced hypertensive disorders | Some concerns | Some concerns | Some concerns | Low | Some concerns | Some concerns |
| Santamaria | Neonatal intensive care unit admission   | Some concerns | Some concerns | Some concerns | Low | Some concerns | Some concerns |

|            |                                          |               |               |               |     |               |               |
|------------|------------------------------------------|---------------|---------------|---------------|-----|---------------|---------------|
| Santamaria | Shoulder dystocia                        | Some concerns | Some concerns | Some concerns | Low | Some concerns | Some concerns |
| Santamaria | Insulin therapy                          | Some concerns | Some concerns | Some concerns | Low | Some concerns | Some concerns |
| Santamaria | Neonatal hypoglycemia                    | Some concerns | Some concerns | Some concerns | Low | Some concerns | Some concerns |
| Vitale     | OGTT 0'                                  | Low           | Some concerns | Low           | Low | Some concerns | Some concerns |
| Vitale     | OGTT 60'                                 | Low           | Some concerns | Low           | Low | Some concerns | Some concerns |
| Vitale     | OGTT 120'                                | Low           | Some concerns | Low           | Low | Some concerns | Some concerns |
| Vitale     | GDM                                      | Low           | Some concerns | Low           | Low | Some concerns | Some concerns |
| Vitale     | pregnancy-induced hypertensive disorders | Low           | Some concerns | Low           | Low | Some concerns | Some concerns |
| Vitale     | Insulin need                             | Low           | Some concerns | Low           | Low | Some concerns | Some concerns |

**Table S4.** GRADE: The quality of evidence in the inositol treated groups compared to placebo

| Certainty assessment |                   |              |               |              |             |                      | № of patients      |                    | Effect                           |                                                            | Certainty        | Importance |
|----------------------|-------------------|--------------|---------------|--------------|-------------|----------------------|--------------------|--------------------|----------------------------------|------------------------------------------------------------|------------------|------------|
| № of studies         | Study design      | Risk of bias | Inconsistency | Indirectness | Imprecision | Other considerations | inositol           | placebo            | Relative (95% CI)                | Absolute (95% CI)                                          |                  |            |
| 8                    | randomised trials | serious      | serious       | not serious  | not serious | strong association   | 100/698<br>(14.3%) | 195/659<br>(29.6%) | <b>RR 0.42</b><br>(0.26 to 0.67) | <b>172 fewer per 1 000</b><br>(from 219 fewer to 98 fewer) | ⊕⊕⊕○<br>Moderate |            |

**Glucose 0' (assessed with: mmol/l or mg/dl)**

| Certainty assessment |                   |              |               |              |             |                      | № of patients |         | Effect            |                                                        | Certainty       | Importance |
|----------------------|-------------------|--------------|---------------|--------------|-------------|----------------------|---------------|---------|-------------------|--------------------------------------------------------|-----------------|------------|
| № of studies         | Study design      | Risk of bias | Inconsistency | Indirectness | Imprecision | Other considerations | inositol      | placebo | Relative (95% CI) | Absolute (95% CI)                                      |                 |            |
| 8                    | randomised trials | serious      | serious       | not serious  | not serious | none                 | 698           | 659     | -                 | MD <b>0.17 mmol/l lower</b> (0.26 lower to 0.09 lower) | ⊕⊕○<br>○<br>Low |            |

**Glucose 60' (assessed with: mmol/l or mg/dl)**

|   |                   |         |         |             |             |      |     |     |   |                                                        |                 |  |
|---|-------------------|---------|---------|-------------|-------------|------|-----|-----|---|--------------------------------------------------------|-----------------|--|
| 7 | randomised trials | serious | serious | not serious | not serious | none | 671 | 630 | - | MD <b>0.44 mmol/l lower</b> (0.74 lower to 0.14 lower) | ⊕⊕○<br>○<br>Low |  |
|---|-------------------|---------|---------|-------------|-------------|------|-----|-----|---|--------------------------------------------------------|-----------------|--|

**Glucose 120' (assessed with: mmol/l or mg/dl)**

| Certainty assessment |                   |              |               |              |             |                      | № of patients |         | Effect            |                                                        | Certainty       | Importance |
|----------------------|-------------------|--------------|---------------|--------------|-------------|----------------------|---------------|---------|-------------------|--------------------------------------------------------|-----------------|------------|
| № of studies         | Study design      | Risk of bias | Inconsistency | Indirectness | Imprecision | Other considerations | inositol      | placebo | Relative (95% CI) | Absolute (95% CI)                                      |                 |            |
| 7                    | randomised trials | serious      | serious       | not serious  | not serious | none                 | 671           | 630     | -                 | MD <b>0.37 mmol/l lower</b> (0.69 lower to 0.06 lower) | ⊕⊕○<br>○<br>Low |            |

#### Insulin therapy

|   |                   |         |             |             |         |      |               |              |                               |                                                       |                 |  |
|---|-------------------|---------|-------------|-------------|---------|------|---------------|--------------|-------------------------------|-------------------------------------------------------|-----------------|--|
| 6 | randomised trials | serious | not serious | not serious | serious | none | 24/469 (5.1%) | 48/438 (11%) | <b>RR 0.45</b> (0.28 to 0.73) | <b>60 fewer per 1 000</b> (from 79 fewer to 30 fewer) | ⊕⊕○<br>○<br>Low |  |
|---|-------------------|---------|-------------|-------------|---------|------|---------------|--------------|-------------------------------|-------------------------------------------------------|-----------------|--|

#### Birthweight (assessed with: g)



| Certainty assessment |                   |              |               |              |              |                      | № of patients |         | Effect            |                                                    | Certainty             | Importance |
|----------------------|-------------------|--------------|---------------|--------------|--------------|----------------------|---------------|---------|-------------------|----------------------------------------------------|-----------------------|------------|
| № of studies         | Study design      | Risk of bias | Inconsistency | Indirectness | Imprecision  | Other considerations | inositol      | placebo | Relative (95% CI) | Absolute (95% CI)                                  |                       |            |
| 6                    | randomised trials | serious      | serious       | not serious  | very serious | none                 | 561           | 517     | -                 | MD <b>4.83 lower</b> (96.88 lower to 87.21 higher) | ⊕○○○<br>○<br>Very low |            |

#### Gestational age at birth

|   |                   |         |              |             |             |      |     |     |   |                                                   |                       |  |
|---|-------------------|---------|--------------|-------------|-------------|------|-----|-----|---|---------------------------------------------------|-----------------------|--|
| 6 | randomised trials | serious | very serious | not serious | not serious | none | 561 | 517 | - | MD <b>0.52 higher</b> (0.03 lower to 1.08 higher) | ⊕○○○<br>○<br>Very low |  |
|---|-------------------|---------|--------------|-------------|-------------|------|-----|-----|---|---------------------------------------------------|-----------------------|--|

#### Macrosomia

| Certainty assessment |                   |              |               |              |              |                      | № of patients |               | Effect                           |                                                         | Certainty             | Importance |
|----------------------|-------------------|--------------|---------------|--------------|--------------|----------------------|---------------|---------------|----------------------------------|---------------------------------------------------------|-----------------------|------------|
| № of studies         | Study design      | Risk of bias | Inconsistency | Indirectness | Imprecision  | Other considerations | inositol      | placebo       | Relative (95% CI)                | Absolute (95% CI)                                       |                       |            |
| 5                    | randomised trials | serious      | serious       | not serious  | very serious | none                 | 22/435 (5.1%) | 28/450 (6.2%) | <b>RR 0.74</b><br>(0.28 to 1.99) | <b>16 fewer per 1 000</b><br>(from 45 fewer to 62 more) | ⊕○○○<br>○<br>Very low |            |

#### C-section rate

|   |                   |         |             |             |              |      |                 |                 |                                  |                                                         |                       |  |
|---|-------------------|---------|-------------|-------------|--------------|------|-----------------|-----------------|----------------------------------|---------------------------------------------------------|-----------------------|--|
| 6 | randomised trials | serious | not serious | not serious | very serious | none | 219/540 (40.6%) | 227/502 (45.2%) | <b>RR 0.90</b><br>(0.78 to 1.03) | <b>45 fewer per 1 000</b><br>(from 99 fewer to 14 more) | ⊕○○○<br>○<br>Very low |  |
|---|-------------------|---------|-------------|-------------|--------------|------|-----------------|-----------------|----------------------------------|---------------------------------------------------------|-----------------------|--|

| Certainty assessment |              |              |               |              |             |                      | № of patients |         | Effect            |                   | Certainty | Importance |
|----------------------|--------------|--------------|---------------|--------------|-------------|----------------------|---------------|---------|-------------------|-------------------|-----------|------------|
| № of studies         | Study design | Risk of bias | Inconsistency | Indirectness | Imprecision | Other considerations | inositol      | placebo | Relative (95% CI) | Absolute (95% CI) |           |            |

### Neonatal hypoglycaemia

|   |                   |         |         |             |         |      |               |               |                                  |                                                         |                       |  |
|---|-------------------|---------|---------|-------------|---------|------|---------------|---------------|----------------------------------|---------------------------------------------------------|-----------------------|--|
| 5 | randomised trials | serious | serious | not serious | serious | none | 17/449 (3.8%) | 24/413 (5.8%) | <b>RR 0.53</b><br>(0.10 to 2.71) | <b>27 fewer per 1 000</b><br>(from 52 fewer to 99 more) | ⊕○○○<br>○<br>Very low |  |
|---|-------------------|---------|---------|-------------|---------|------|---------------|---------------|----------------------------------|---------------------------------------------------------|-----------------------|--|

### NICU admission

| Certainty assessment |                   |              |               |              |             |                      | № of patients |               | Effect                           |                                                         | Certainty       | Importance |
|----------------------|-------------------|--------------|---------------|--------------|-------------|----------------------|---------------|---------------|----------------------------------|---------------------------------------------------------|-----------------|------------|
| № of studies         | Study design      | Risk of bias | Inconsistency | Indirectness | Imprecision | Other considerations | inositol      | placebo       | Relative (95% CI)                | Absolute (95% CI)                                       |                 |            |
| 4                    | randomised trials | serious      | not serious   | not serious  | serious     | none                 | 8/414 (1.9%)  | 14/375 (3.7%) | <b>RR 0.60</b><br>(0.24 to 1.47) | <b>15 fewer per 1 000</b><br>(from 28 fewer to 18 more) | ⊕⊕○<br>○<br>Low |            |

#### Preterm birth

|   |                   |         |             |             |             |                    |               |               |                                  |                                                          |              |  |
|---|-------------------|---------|-------------|-------------|-------------|--------------------|---------------|---------------|----------------------------------|----------------------------------------------------------|--------------|--|
| 6 | randomised trials | serious | not serious | not serious | not serious | strong association | 15/540 (2.8%) | 36/502 (7.2%) | <b>RR 0.41</b><br>(0.22 to 0.75) | <b>42 fewer per 1 000</b><br>(from 56 fewer to 18 fewer) | ⊕⊕⊕⊕<br>High |  |
|---|-------------------|---------|-------------|-------------|-------------|--------------------|---------------|---------------|----------------------------------|----------------------------------------------------------|--------------|--|

| Certainty assessment |              |              |               |              |             |                      | № of patients |            | Effect            |                   | Certainty | Importance |
|----------------------|--------------|--------------|---------------|--------------|-------------|----------------------|---------------|------------|-------------------|-------------------|-----------|------------|
| № of studies         | Study design | Risk of bias | Inconsistency | Indirectness | Imprecision | Other considerations | Intervention  | Comparator | Relative (95% CI) | Absolute (95% CI) |           |            |

### Shoulder dystocia

|   |                   |         |             |             |              |      |              |              |                                  |                                                        |                       |  |
|---|-------------------|---------|-------------|-------------|--------------|------|--------------|--------------|----------------------------------|--------------------------------------------------------|-----------------------|--|
| 3 | randomised trials | serious | not serious | not serious | very serious | none | 2/291 (0.7%) | 4/304 (1.3%) | <b>RR 0.59</b><br>(0.12 to 2.82) | <b>5 fewer per 1 000</b><br>(from 12 fewer to 24 more) | ⊕○○○<br>○<br>Very low |  |
|---|-------------------|---------|-------------|-------------|--------------|------|--------------|--------------|----------------------------------|--------------------------------------------------------|-----------------------|--|

### Pregnancy-induced hypertensive disorders

|   |                   |         |             |         |         |                    |               |               |                                  |                                                          |                  |  |
|---|-------------------|---------|-------------|---------|---------|--------------------|---------------|---------------|----------------------------------|----------------------------------------------------------|------------------|--|
| 7 | randomised trials | serious | not serious | serious | serious | strong association | 17/650 (2.6%) | 46/615 (7.5%) | <b>RR 0.39</b><br>(0.22 to 0.69) | <b>46 fewer per 1 000</b><br>(from 58 fewer to 23 fewer) | ⊕⊕○○<br>○<br>Low |  |
|---|-------------------|---------|-------------|---------|---------|--------------------|---------------|---------------|----------------------------------|----------------------------------------------------------|------------------|--|

**CI:** confidence interval; **MD:** mean difference; **RR:** risk ratio

## REFERENCES

1. Celentano C, Matarrelli B, Pavone G, Vitacolonna E, Mattei PA, Berghella V, et al. The influence of different inositol stereoisomers supplementation in pregnancy on maternal gestational diabetes mellitus and fetal outcomes in high-risk patients: a randomized controlled trial. *J Matern Fetal Neonatal Med.* 2020;33(5):743-51.
2. D'Anna R, Scilipoti A, Giordano D, Caruso C, Cannata ML, Interdonato ML, et al. myo-Inositol supplementation and onset of gestational diabetes mellitus in pregnant women with a family history of type 2 diabetes: a prospective, randomized, placebo-controlled study. *Diabetes Care.* 2013;36(4):854-7.
3. D'Anna R, Di Benedetto A, Scilipoti A, Santamaria A, Interdonato ML, Petrella E, et al. Myo-inositol Supplementation for Prevention of Gestational Diabetes in Obese Pregnant Women: A Randomized Controlled Trial. *Obstet Gynecol.* 2015;126(2):310-5.
4. Esmaeilzadeh S, Ghadimi R, Mashayekh-Amiri S, Delavar MA, Basirat Z. The effect of myo-inositol supplementation on the prevention of gestational diabetes in overweight pregnant women: a randomized, double-blind, controlled trial. *Minerva Obstet Gynecol.* 2022.
5. Farren M, Daly N, McKeating A, Kinsley B, Turner MJ, Daly S. The Prevention of Gestational Diabetes Mellitus With Antenatal Oral Inositol Supplementation: A Randomized Controlled Trial. *Diabetes Care.* 2017;40(6):759-63.
6. Matarrelli B, Vitacolonna E, D'Angelo M, Pavone G, Mattei PA, Liberati M, et al. Effect of dietary myo-inositol supplementation in pregnancy on the incidence of maternal gestational diabetes mellitus and fetal outcomes: a randomized controlled trial. *J Matern Fetal Neonatal Med.* 2013;26(10):967-72.
7. Santamaria A, Di Benedetto A, Petrella E, Pintaudi B, Corrado F, D'Anna R, et al. Myo-inositol may prevent gestational diabetes onset in overweight women: a randomized, controlled trial. *J Matern Fetal Neonatal Med.* 2016;29(19):3234-7.
8. Vitale SG, Corrado F, Caruso S, Di Benedetto A, Giunta L, Cianci A, et al. Myo-inositol supplementation to prevent gestational diabetes in overweight non-obese women: bioelectrical impedance analysis, metabolic aspects, obstetric and neonatal outcomes - a randomized and open-label, placebo-controlled clinical trial. *Int J Food Sci Nutr.* 2021;72(5):670-9.
